# Supplementary material
Source: PubMed Central journal article supplement (PMC5033910)
Supplement: jciinsight-1-88797-s001.pdf [file jciinsight-1-88797-s001.pdf]

## Supplemental Table

| Screening method                                                             | Total GBT lines screened | Total ZIC mutants | GBT number of ZIC mutants                                                                                                                                              |
|------------------------------------------------------------------------------|--------------------------|-------------------|------------------------------------------------------------------------------------------------------------------------------------------------------------------------|
| Screening for mutants with positive mRFP signal detected in embryonic hearts | 405                      | 27                | 0001*, 0002*, 0025, 0080, 0103, 0135, 0136, 0145, 0166, 0193, 0235, 0268, 0270, 0345, 0360, 0361, 0364, 0377, 0410, 0411, 0412, 0415, 0416, 0419, 0422, 0424, and 0425 |
| Screening for mutants with positive mRFP signal detected in adult hearts     | 204                      | 17                | 0130, 0159, 0172, 0239, 0249, 0250, 0298, 0299, 0317, 0340, 0386,, 0389, 0402, 0503, 0513, 0585, and 0589                                                              |
| Total                                                                        | 609                      | 44                |                                                                                                                                                                        |

~~Supplemental Table 1: Summary of the Zebrafish Insertional Cardiac (ZIC) mutant collection.~~  
 \*,Gene-breaking transposon (GBT) lines based on R15 vector, other lines are based on GBT-RP2 vector (14,15). For more information about these GBT lines, see [www.zfishbook.org](http://www.zfishbook.org).

## Supplemental Figures

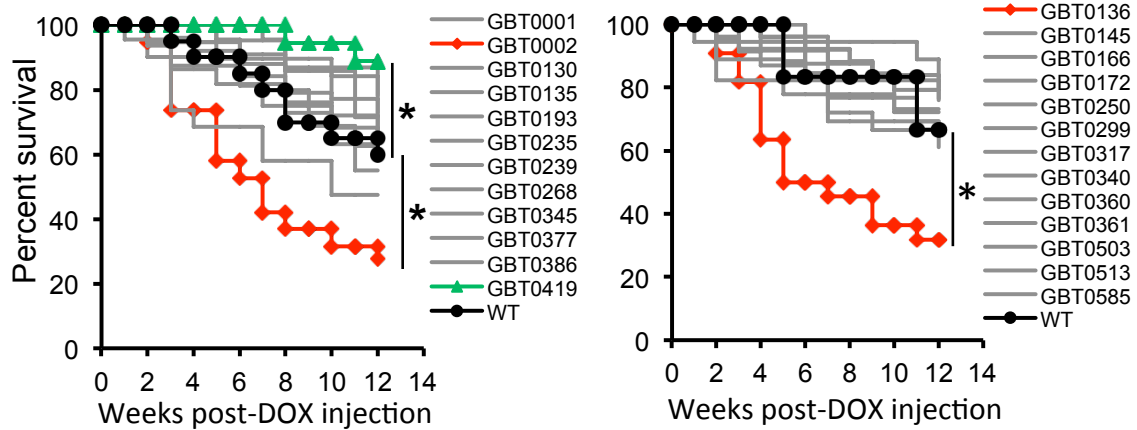

**Supplemental Figure 1. A modifier screen of zebrafish insertional cardiac (ZIC) mutants identified 3 known cardiomyopathy-susceptibility genes. (A)** Kaplan-Meier survival curves of adult wild type (WT) and gene-breaking transposon (GBT) heterozygous fish injected with a single bolus of 20  $\mu\text{g}/\text{gram}$  body mass (gbm) doxorubicin (DOX). *GBT0002/sorbs2b* and *GBT0136/ano5a* were identified that accelerated DOX-induced fish death, while *GBT0419/rxraa* significantly reduced DOX-induced fish death (n=15-25). \*  $P < .05$  vs WT control, log-rank test.

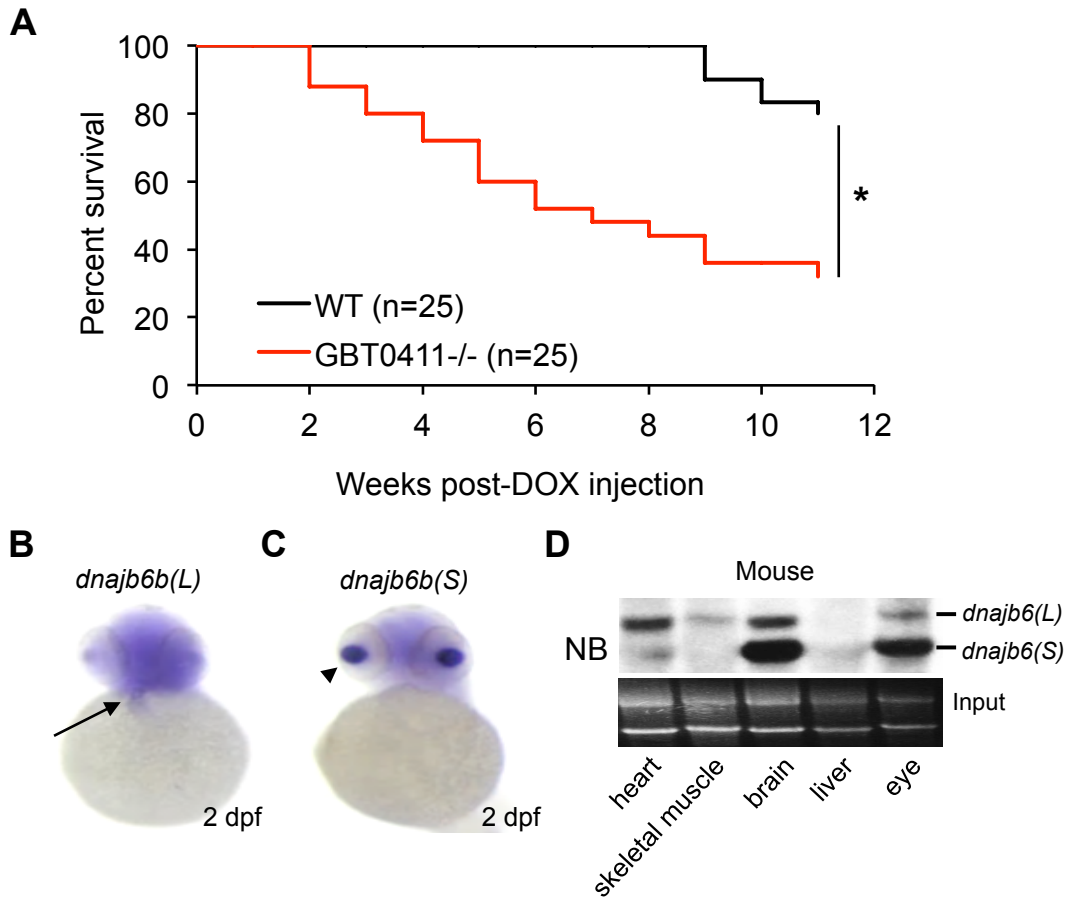

**Supplemental Figure 2. Disruption of *dnajb6(L)*, the major isoform expressed in the heart, accelerated doxorubicin (DOX)-induced zebrafish death. (A)** Kaplan-Meier survival curves of gene-breaking transposon (*GBT*)0411-/- and WT control fish injected with a single bolus of 20  $\mu\text{g/gbm}$  DOX. \*  $P < .05$ , log-rank test. **(B-C)** Whole mount In situ hybridization analysis of the *dnajb6b(L)* and *dnajb6b(S)* isoforms in zebrafish embryos at 2 days post-fertilization (dpf). Arrow indicates heart expression; arrowhead indicates lens expression. **(D)** Northern blot (NB) analysis of *dnajb6(S)* and *dnajb6(L)* isoforms in 3 months old WT C57BL/6 mouse tissues.

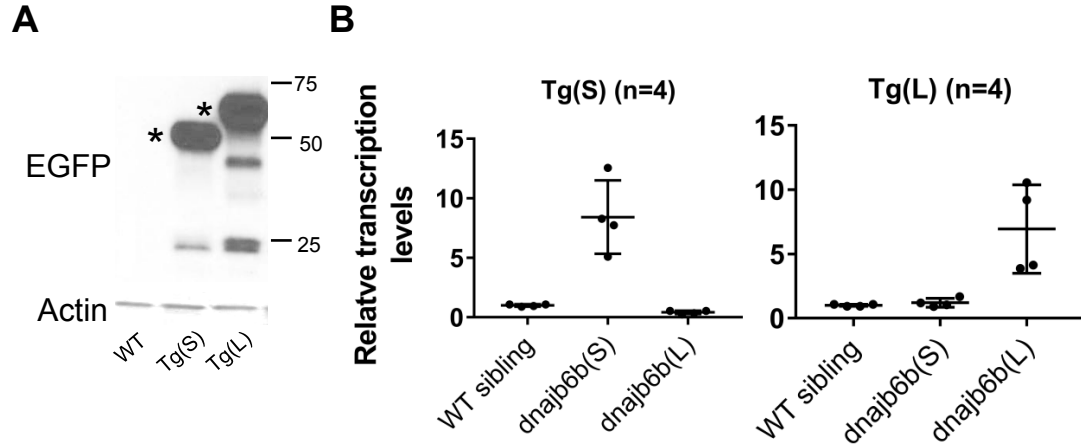

**Supplemental Figure 3. Generation of cardiac-specific overexpression of *dnajb6b(S)* and *dnajb6b(L)* stable transgenic fish lines driven by the cardiac myosin light chain-2 (*cmhc2*) enhancer. (A) Western blot analysis detected Dnajb6b(S)-EGFP and Dnajb6b(L)-EGFP fusion proteins from heart lysate of *Tg(cmhc2:dnajb6(S)-EGFP* or *Tg(cmhc2:dnajb6(L)-EGFP* transgenic fish. \* indicate EGFP fusion proteins with expected size. (B) Quantitative reverse transcriptase polymerase chain reaction detected overexpression of *dnajb6b(S)* and *dnajb6b(L)* transcripts from corresponding transgenic fish hearts. Values are relative unit to WT sibling controls. Data represent mean  $\pm$  SEM.**

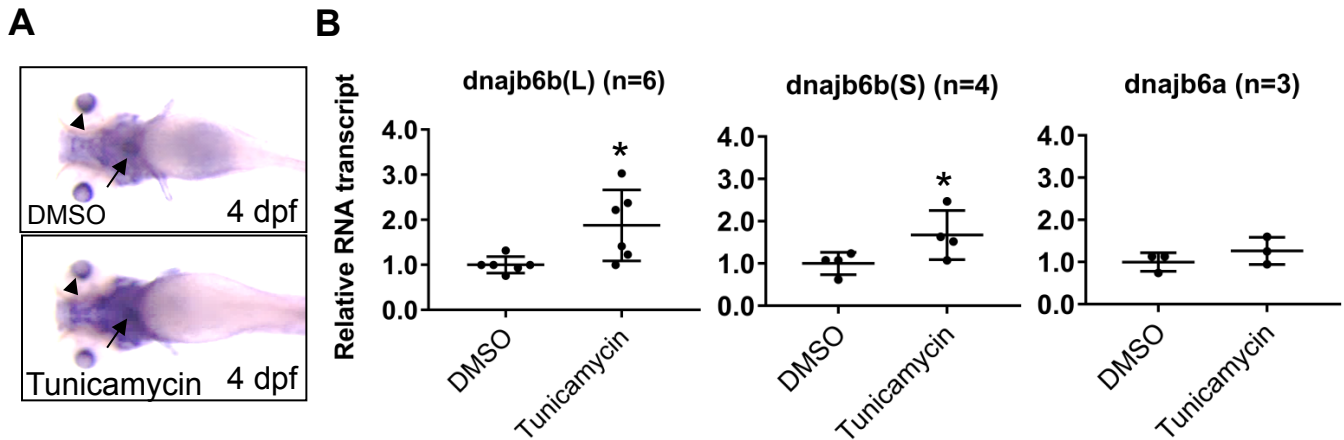

**Supplemental Figure 4. *dnajb6b(L)* was activated transcriptionally upon tunicamycin treatment.** (A) Whole-mount in situ hybridization analysis of *dnajb6b(S)* and *dnajb6b(L)* transcript levels in embryos with or without tunicamycin treatment at the concentration of 1  $\mu$ g/mL for 1 day from 3 to 4 days post-fertilization (dpf). Arrows indicate cardiac expression; arrowheads indicate lens expression. (B) Quantitative reverse transcriptase polymerase chain reaction analysis of the transcript levels of *dnajb6b(S)*, *dnajb6b(L)*, and *dnajb6a* in embryos at 4 dpf with or without tunicamycin at the concentration of 1  $\mu$ g/mL for 1 day from 3 to 4 dpf. *gapdh* was used as an internal input control. Values are relative unit to DMSO control. Data represent mean  $\pm$  SEM. \*  $P < .05$ , Student's *t* test.

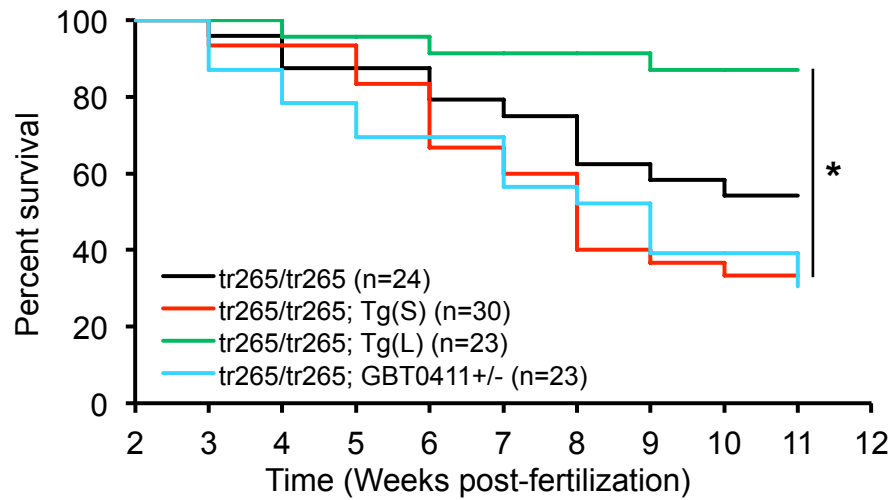

**Supplemental Figure 5. Overexpression of *dnajb6b(L)* in cardiomyocytes reduced the death rate in anemia-induced cardiomyopathy.** Kaplan-Meier survival curves of *tr265/tr265* homozygous fish with or without double crossed with the cardiac-specific *Tg(cmlc2:dnajb6b(S)-EGFP)*, *Tg(cmlc2:dnajb6b(L)-EGFP)*, or *GBT0411* heterozygous mutant. *tr265/tr265* is a zebrafish homozygous mutant with a Band 3 mutation which results in anemia and cardiomyopathy due to disrupted erythrocyte formation (17). *tr265/tr265; Tg(cmlc2:dnajb6b(L)-EGFP)* versus *tr265/tr265* fish, \*  $P < .05$ , log-rank test.
